# Supplementary material for: Efficient enrichment of glycopeptides using metal–organic frameworks by hydrophilic interaction chromatography
Source: Royal Society of Chemistry journal article supplement (doi:10.1039/c4an00971a), 2014-01-01
Supplement: c4an00971a1.pdf [file c4an00971a1.pdf]

## **Efficient enrichment of glycopeptides using metal-organic frameworks by hydrophilic interaction chromatography**

<sup>a</sup> Key Laboratory of Separation Sciences for Analytical Chemistry, National Chromatographic R&A Center, Dalian Institute of Chemical Physics, Chinese Academy of Sciences (CAS), Dalian 1160237, China.

<sup>b</sup> College of pharmacy, Henan University of Traditional Chinese Medicine, Zhengzhou 450000, China

<sup>c</sup> Shanghai Key Laboratory of Functional Materials Chemistry, Department of Chemistry and Molecular Engineering, East China University of Science and Technology, Shanghai 200237, China.

\* To whom correspondence should be addressed:

Prof. Hanfa Zou

Tel: +86-411-84379610

Fax: +86-411-84379620

E-mail: hanfazou@dicp.ac.cn

Table S1 Molecular masses and proposed oligosaccharide composition of the glycopeptides from human IgG after enrichment by LCD-MOFs. N# denotes the N-linked glycosylation site.

| Peak number | Observed $m/z$ | Glycan composition    | Amino acid sequence |
|-------------|----------------|-----------------------|---------------------|
| I1          | 2399.2         | [Hex]3[HexNAc]3[Fuc]1 | EEQFN#STFR          |
| I2          | 2431.0         | [Hex]3[HexNAc]3[Fuc]1 | EEQYN#STYR          |
| I3          | 2456.2         | [Hex]3[HexNAc]4       | EEQFN#STFR          |
| I4          | 2488.2         | [Hex]3[HexNAc]4       | EEQYN#STYR          |
| I5          | 2561.2         | [Hex]4[HexNAc]3[Fuc]1 | EEQFN#STFR          |
| I6          | 2602.3         | [Hex]3[HexNAc]4[Fuc]1 | EEQFN#STFR          |
| I7          | 2618.2         | [Hex]4[HexNAc]4       | EEQFN#STFR          |
| I8          | 2634.0         | [Hex]3[HexNAc]4[Fuc]1 | EEQYN#STYR          |
| I9          | 2764.3         | [Hex]4[HexNAc]4[Fuc]1 | EEQFN#STFR          |
| I10         | 2780.3         | [Hex]5[HexNAc]4       | EEQFN#STFR          |
| I11         | 2796.4         | [Hex]4[HexNAc]4[Fuc]1 | EEQYN#STYR          |
| I12         | 2805.3         | [Hex]3[HexNAc]5[Fuc]1 | EEQFN#STFR          |
| I13         | 2821.3         | [Hex]4[HexNAc]5       | EEQFN#STFR          |
| I14         | 2837.4         | [Hex]3[HexNAc]5[Fuc]1 | EEQYN#STYR          |
| I15         | 2853.2         | [Hex]4[HexNAc]5       | EEQYN#STYR          |
| I16         | 2926.4         | [Hex]5[HexNAc]4[Fuc]1 | EEQFN#STFR          |
| I17         | 2958.4         | [Hex]5[HexNAc]4[Fuc]1 | EEQYN#STYR          |
| I18         | 2967.4         | [Hex]4[HexNAc]5[Fuc]1 | EEQFN#STFR          |
| I19         | 3000.3         | [Hex]4[HexNAc]5[Fuc]1 | EEQYN#STYR          |
| I20         | 3130.5         | [Hex]5[HexNAc]5[Fuc]1 | EEQFN#STFR          |

Table S2 N-Glycosylation sites identified from 3 g of the five-glycoprotein mixture with LCD-MOFs

| Protein name                         | Site | Modified Sequence                     |
|--------------------------------------|------|---------------------------------------|
| Bovin Fetuin-A                       | N99  | R.RPTGEVYDIEIDTLETTCHVLDPTPLAN*CSVR.Q |
| Bovin Fetuin-A                       | N176 | R.VVHAVEVALATFNAESN*GSYLQLVEISR.A     |
| Bovin Fetuin-A                       | N156 | R.KLCPDCPLLAPLN*DSR.V                 |
| Bovin Fetuin-B                       | N271 | R.GEN*ATVNQRPANPSK.T                  |
| Bovin Fetuin-B                       | N137 | R.IFYLPAYN*CTLR.P                     |
| Chick Ovalbumin                      | N293 | K.YN*LTSVLMAMGITDVFSSSANLSGISSAESLK.I |
| Chick Ovalbumin                      | N312 | K.YNLTSVLMAMGITDVFSSSAN*LSGISSAESLK.I |
| Human Serotransferrin                | N432 | K.CGLVPVLAENYN*K.S                    |
| Human Serotransferrin                | N630 | R.QQQHLFGSN*VTDCSGNFCLFR.S            |
| Human IgG 1                          | N180 | K.TKPREEQYN*STYR.V                    |
| Human IgG 2                          | N176 | R.EEQFN*STFR.V                        |
| Human IgG3                           | N227 | R.EEQYN*STFR.V                        |
| Human IgG 4                          | N177 | R.EEQFN*STYR.V                        |
| Human $\alpha$ 1-acid glycoprotein 1 | N56  | K.WFYIASAFRNEEYN*K.S                  |
| Human $\alpha$ 1-acid glycoprotein 1 | N72  | R.NEEYNKSVQEIQATFFYFTPN*KTEDTIFLR.E   |
| Human $\alpha$ 1-acid glycoprotein 1 | N93  | R.QDQCIYN*TTYLNVQR.E                  |
| Human $\alpha$ 1-acid glycoprotein 2 | N93  | R.QNQCFYN*SSYLNVQR.E                  |

Table s2 List of identified glycoproteins and unique N-glycosylation sites from 33 µg mouse liver captured by LCD-MOF

| No | IPI Accession | Swiss-Prot | Protein Name                                                                                           | Glycosites                                                          | Sequence                                                                                                                                                             |
|----|---------------|------------|--------------------------------------------------------------------------------------------------------|---------------------------------------------------------------------|----------------------------------------------------------------------------------------------------------------------------------------------------------------------|
| 1  | IPI00111908.8 | Q8C196     | Cps1 Carbamoyl-phosphate synthase [ammonia], mitochondrial                                             | N324                                                                | R.GQNQPVLN*ITNR.Q                                                                                                                                                    |
| 2  | IPI00653158.1 |            | Acaa2 Acetyl-Coenzyme A acyltransferase 2 (Mitochondrial 3-oxoacyl-Coenzyme A thiolase), isoform CRA_k | N249                                                                | K.DGTVTAGN*ASGVSDGAGAVIIASEDAVK.K                                                                                                                                    |
| 3  | IPI00119063.2 | Q91ZX7     | Lrp1 Prolow-density lipoprotein receptor-related protein 1                                             | N3789<br>N1512<br>N2128<br>N4076<br>N3954<br>N730<br>N2621<br>N4365 | K.LTSCATN*ASM#CGDEAR.C<br>K.WTGHN*VTVVQR.T<br>K.DN*ATDSVPLR.T<br>R.LN*GTDPIVAADSK.R<br>R.GVTHLN*ISGLK.M<br>R.IETILLN*GTDR.K<br>R.DGSCIGN*SSR.C<br>K.QTGDVTCN*CTDGR.V |
| 4  | IPI00462072.3 | P17182     | Eno1;Gm5506 Alpha-enolase                                                                              | N70                                                                 | K.GVSQAVEHIN*K.T                                                                                                                                                     |
| 5  | IPI00139788.2 | Q921I1     | Trf Serotransferrin                                                                                    | N513                                                                | K.N*STLCDLCIGPLK.C                                                                                                                                                   |
| 6  | IPI00121190.1 | Q01279     | Egfr Epidermal growth factor receptor                                                                  | N352<br>N568<br>N603<br>N528                                        | K.DTLSIN*ATNIK.H<br>R.EFVENSECIQCHPECLPQAM#N*ITCTGR.G<br>K.TCPAGIMGEN*NTLVWK.Y<br>R.DCVSCQN*VSR.G                                                                    |
| 7  | IPI00604969.3 |            | Ttn titin isoform N2-A                                                                                 | N27342                                                              | K.NFVLTAVN*NTFYTRYEPTSR.L                                                                                                                                            |
| 8  | IPI00131830.1 | P07759     | Serpina3k Serine protease inhibitor A3K                                                                | N185<br>N270                                                        | K.NLINDYVSN*QTQGM#IK.E<br>K.YTGN*ASALLILPDQGR.M                                                                                                                      |
| 9  | IPI00381178.3 | Q63880-1   | Es31 Isoform 1 of Liver carboxylesterase 31                                                            | N311<br>N317                                                        | K.KNVN*ISYTVNDSFFPQRPQK.L<br>K.NVNISYTVN*DSFFPQRPQK.L                                                                                                                |

|    |               |          |                                                             |                                      |                                                                                                               |
|----|---------------|----------|-------------------------------------------------------------|--------------------------------------|---------------------------------------------------------------------------------------------------------------|
| 10 | IPI00138084.2 | P55264-2 | Adk Isoform Short of Adenosine kinase                       | N131                                 | R.KAADAHVDAHYEQNEQPTGTCAACITGG<br>N*R.S                                                                       |
| 11 | IPI00123342.4 | Q9JKR6   | Hyou1 Hypoxia up-regulated protein 1                        | N596<br>N931<br>N862<br>N830<br>N869 | K.EN*GTDAVQEEEESPAEGSK.D<br>R.AEPPLN*ASAGDQEEK.V<br>K.VIN*DTWAWK.N<br>R.LSALDNLLN*HSSIFLK.G<br>K.N*ATLAEQAK.L |
| 12 | IPI00123223.2 | P28665   | Mug1 Murinoglobulin-1                                       | N993<br>N1142<br>N294                | K.YLN*ETQQLTQK.I<br>R.N*ASFVYTK.A<br>R.EVNSQLDNNGCSTQEVN*ITELQSK.K                                            |
| 13 | IPI00323357.3 | P63017   | Hspa8 Heat shock cognate 71 kDa protein                     | N584                                 | K.N*QTAEKEEFEHQK.E                                                                                            |
| 14 | IPI00129526.1 | P08113   | Hsp90b1 Endoplasmin                                         | N62                                  | R.EEEAIQLDGLN*ASQIR.E                                                                                         |
| 15 | IPI00624663.3 | Q61838   | Pzp Uncharacterized protein                                 | N568<br>N881                         | K.VN*LSFPSAQSLPASDTHLK.V<br>K.SLGEVN*FTATAEALQSPELCGNK.L                                                      |
| 16 | IPI00321190.1 | Q61207   | Psap Sulfated glycoprotein 1                                | N459<br>N80<br>N214                  | K.N*STKEEILAALEK.G<br>K.DN*ATQEEILHYLEK.T<br>K.TN*SSFIQGFVDHVK.E                                              |
| 17 | IPI00230690.1 | Q91ZU6-1 | Dst Isoform 2 of Dystonin                                   | N2802                                | K.EGVLMSPEEGGEEERDLEPPFN*GSATESL<br>NM#GK.S                                                                   |
| 18 | IPI00138342.3 | P23953   | Es1 Liver carboxylesterase N                                | N79<br>N377<br>N274                  | K.N*ATSYPPMCSDAGWAK.I<br>R.FHSELN*ISESM#IPAVIEK.Y<br>K.NIQAVNEIATLSQCN*DTSSAAM#VQCLR.Q                        |
| 19 | IPI00466069.3 | P58252   | Eef2 Elongation factor 2                                    | N827                                 | R.SNTGGQAFPQCVFDHWQILPGDPFDN*SSRP<br>SQVVAETR.K                                                               |
| 20 | IPI00153143.1 | Q8R084   | Ugt2b1 UDP glucuronosyltransferase 2 family, polypeptide B1 | N96                                  | K.WVGN*WTYELK.K                                                                                               |

|    |               |          |                                                                       |       |                                            |
|----|---------------|----------|-----------------------------------------------------------------------|-------|--------------------------------------------|
| 21 | IPI00321617.1 | P34914-1 | Ephx2 Isoform 1 of Epoxide hydrolase 2                                | N436  | K.ATEIGGILVNTPEDPN*LSK.I                   |
|    |               |          |                                                                       | N85   | K.ACGANLPEN*FSISQIFSQAMAAR.S               |
| 22 | IPI00553798.2 |          | Ahnak AHNAK nucleoprotein isoform 1                                   | N3965 | K.LNLGVDPM#SIKHTQIN*MSPMK.F                |
| 23 | IPI00119203.4 | P50544   | Acadvl Very long-chain specific acyl-CoA dehydrogenase, mitochondrial | N307  | K.M#GIKASN*TSEVYFDGVKVPSENVLGEVG<br>DGFK.V |
| 24 | IPI00620362.4 | Q8R081   | Hnrnp1 Heterogeneous nuclear ribonucleoprotein L                      | N286  | K.NDQDTWDYTNPN*LSGQGDPGSNPNKR.Q            |
| 25 | IPI00409148.2 | Q61646   | Hp Haptoglobin                                                        | N148  | K.NLFLN*HSETASAK.D                         |
|    |               |          |                                                                       | N182  | K.VVLHPN*HSVVDIGLIK.L                      |
| 26 | IPI00128399.3 |          | AU018778 Putative uncharacterized protein                             | N79   | K.N*ATTYPPM#CSQDAAR.G                      |
| 27 | IPI00111286.1 | Q9CYA0   | Creld2 Cysteine-rich with EGF-like domain protein 2                   | N188  | R.N*ETHSICSACDESCK.T                       |
| 28 | IPI00551206.2 |          | C4a;C4b sex-limited protein                                           | N224  | R.FSDGLESN*R.S                             |
|    |               |          |                                                                       | N1321 | K.ALN*VTLSSM#GR.N                          |
|    |               |          |                                                                       | N1384 | K.N*TTCQDLQIEVK.V                          |
| 29 | IPI00111013.1 | P18242   | Ctsd Cathepsin D                                                      | N261  | K.YYHGELSYLN*VTR.K                         |
| 30 | IPI00387289.3 | Q8VCT4   | Ces3 Carboxylesterase 3                                               | N79   | K.N*TTSYPPMCSQDAVGGQVLSELFTR.K             |
| 31 | IPI00230084.5 | Q9DBF1-1 | Aldh7a1 Isoform 1 of Alpha-aminoadipic semialdehyde dehydrogenase     | N56   | R.EDNEGVYN*GSWGGR.G                        |
| 32 | IPI00874675.2 |          | Dst 829 kDa protein                                                   | N4449 | R.VSKEGANN*VSCLNDK.V                       |
| 33 | IPI00469218.1 | P11438   | Lamp1 Putative uncharacterized protein                                | N160  | K.N*VTVVLR.D                               |
|    |               |          |                                                                       | N253  | R.AFNISPN*DTSSGSCGINLVTLK.V                |
|    |               |          |                                                                       | N98   | R.GYLLTLN*FTK.N                            |
| 34 | IPI00279079.1 | Q8K0E8   | Fgb Fibrinogen beta chain                                             | N384  | K.GTAGNALM#DGASQLVGEN*R.T                  |
| 35 | IPI00113869.1 | P18572-2 | Bsg Isoform 2 of Basigin                                              | N44   | K.TQLTCSLN*SSGVDIVGHR.W                    |
| 36 | IPI00230008.2 | Q0VAV2   | Exph5 Exophilin-5                                                     | N1791 | R.HFSEN*TSIDNALSQLSLEDGSPNSGYNRRF<br>K.S   |
| 37 | IPI00720238.2 |          | Neb Nebulin                                                           | N4682 | K.N*M#THANQKALVMDM#SDTLK.K                 |

|    |               |          |                                                                      |       |                                              |
|----|---------------|----------|----------------------------------------------------------------------|-------|----------------------------------------------|
| 38 | IPI00421190.5 |          | Stag2 cohesin subunit SA-2                                           | N1174 | K.GGGN*GSKGKEAPGK.K                          |
| 39 | IPI00622850.2 |          | Myo5c myosin VC                                                      | N154  | R.N*QSIIVSGESGAGK.T                          |
| 40 | IPI00349296.6 | Q0VGY8-1 | Tanc1 Isoform 1 of Protein TANC1                                     | N1546 | R.N*SSTKIQVSSQNPPPSPM#PGR.V                  |
| 41 | IPI00720238.2 |          | Neb Nebulin                                                          | N6634 | R.NQEN*ISSVLYSDSFR.K                         |
| 42 | IPI00928536.1 |          | Gm1305 Uncharacterized protein                                       | N283  | R.LREGSRVN*LSLTSLGNVISALADLAM#GK.K           |
|    |               |          |                                                                      | N226  | K.IRMTASTNM#N*ASSSR.S                        |
| 43 | IPI00662244.2 |          | Agl amylo-1,6-glucosidase, 4-alpha-glucanotransferase                | N1236 | R.NMKDEGFN*ITAGIDEETGFVYGGNR.F               |
|    |               |          |                                                                      | N801  | R.NTKPYKKDENSINGMPN*MTVELR.E                 |
| 44 | IPI00480490.3 | Q5HZI1-1 | Mtus1 Isoform 1 of Microtubule-associated tumor suppressor 1 homolog | N564  | K.AEIPIN*KTHK.Q                              |
| 45 | IPI00462140.1 | Q6IFZ6   | Krt77 Keratin, type II cytoskeletal 1b                               | N206  | K.WELLQQVN*TSTR.T                            |
| 46 | IPI00154043.1 |          | Ces6 MCG23407                                                        | N275  | K.TVAN*LSGCEATDSEALIHCLR.A                   |
| 47 | IPI00120832.1 | P04939   | Mup3 Major urinary protein 3                                         | N66   | R.AFVEN*ITVLENSLVFK.F                        |
| 48 | IPI00117379.3 | O08997   | Atox1 Copper transport protein ATOX1                                 | N56   | K.VCIDSEHSSDTLLATLN*K.T                      |
| 49 | IPI00118447.1 | P42669   | Pura Transcriptional activator protein Pur-alpha                     | N95   | R.FLKIAEVGAGGN*KSR.L                         |
| 50 | IPI00109108.2 | P46978   | Stt3a Putative uncharacterized protein                               | N596  | R.TILVDNNTWN*NTHISR.V                        |
| 51 | IPI00856568.1 | O88492-2 | Plin4 Isoform 2 of Perilipin-4                                       | N845  | K.AMNAAGM#VGTTVTDKTNLTLVN*K.S                |
| 52 | IPI00113302.1 | Q9ESF1-1 | Otof Isoform 1 of Otoferlin                                          | N432  | R.MN*TSLMANVK.K                              |
| 53 | IPI00222648.3 | Q8BL06-1 | Usp54 Isoform 1 of Inactive ubiquitin carboxyl-terminal hydrolase 54 | N437  | K.QAPRN*ASK.S                                |
| 54 | IPI00125829.3 | Q924N4-1 | Slc12a6 Isoform 1 of Solute carrier family 12 member 6               | N1096 | K.LNEVIVN*K.S                                |
| 55 | IPI00381303.5 | O09159   | Man2b1 Lysosomal alpha-mannosidase                                   | N367  | K.AN*LTWTVK.E                                |
|    |               |          |                                                                      | N497  | R.ELN*ISICPVSQTSER.F                         |
|    |               |          |                                                                      | N767  | R.DDYRPTWTLN*QTEPVAGNYYPVNTR.I               |
| 56 | IPI00874660.2 |          | Srgap3 GAP3                                                          | N977  | R.SSSSSSSGVGSPA VTPTEKM#FPN*SSSDKSG<br>TM#.- |

|    |               |          |                                                                                            |                |                                               |
|----|---------------|----------|--------------------------------------------------------------------------------------------|----------------|-----------------------------------------------|
| 57 | IPI00670741.3 | Q3UHK8   | Tnrc6a Trinucleotide repeat-containing gene 6A protein                                     | N252           | R.N*ITVM#ASGNTGGEKDGLR.N                      |
| 58 | IPI00127472.2 | P98203-3 | Arvcf Isoform 3 of Armadillo repeat protein deleted in velo-cardio-facial syndrome homolog | N530           | R.N*VSSDGAEAR.R                               |
| 59 | IPI00620780.1 | Q4KWH5-1 | Plch1 Isoform 1 of 1-phosphatidylinositol-4,5-bisphosphate phosphodiesterase eta-1         | N963           | K.KPNAPLPDGSFPN*FTGKCMQQPK.L                  |
| 60 | IPI00123194.1 | P28653   | Bgn Biglycan                                                                               | N271           | R.M#IEN*GSLSFPLTLR.E                          |
| 61 | IPI00108535.1 | P31809-1 | Ceacam1 Isoform Long of Carcinoembryonic antigen-related cell adhesion molecule 1          | N375           | R.M#TLSQN*NSILR.I                             |
| 62 | IPI00344641.6 |          | Cecr2 cat eye syndrome chromosome region, candidate 2 homolog                              | N226<br>N920   | R.NPVSVN*R.S<br>R.ELN*DSM#K.T                 |
| 63 | IPI00466652.2 | P31651   | Slc6a12 Solute carrier family 6 (Neurotransmitter transporter, betaine/GABA), member 12    | N197           | R.GVSSSEN*FTSPVMEFWER.R                       |
| 64 | IPI00345676.5 | A2AJK6-1 | Chd7 Isoform 1 of Chromodomain-helicase-DNA-binding protein 7                              | N1215          | K.N*FTFLSKGGGQANVPNLLNTM#M#ELR.K              |
| 65 | IPI00463909.3 | Q7TMY8-1 | Huwe1 E3 ubiquitin-protein ligase HUWE1                                                    | N2683<br>N2688 | K.ELEQGN*SSKSN*K.S<br>K.ELEQGN*SSKSN*K.S      |
| 66 | IPI00853932.1 | Q8BPN8-1 | Dmxl2 Isoform 1 of DmX-like protein 2                                                      | N2472          | K.TANVCAYMMIN*KSLSNADGSPFAVPIRSSF<br>SVQVQR.F |
| 67 | IPI00622912.3 |          | Ryr1 ryanodine receptor 1, skeletal muscle                                                 | N3953          | K.DVIEEQGKRN*FSK.A                            |
| 68 | IPI00131330.9 |          | Usp32 ubiquitin specific protease 32                                                       | N455           | R.ISNNLGYMN*TTEEK.Y                           |
| 69 | IPI00113824.1 | Q05793   | Hspg2 Basement membrane-specific heparan sulfate proteoglycan core protein                 | N89<br>N3098   | R.ALVN*FTR.S<br>R.SLTQGSLIVGNLAPVN*GTSQGK.F   |
| 70 | IPI00378224.2 | Q6P6J9   | Txndc15 Thioredoxin domain-containing protein 15                                           | N277           | K.IFIFN*QTGIEAK.K                             |
| 71 | IPI00761436.3 | D3Z3U8   | Muc4 mucin-4                                                                               | N3003          | R.TIGQSTNSILNEFQHM#NDTLNQYPPSIN*CSS           |



|    |               |          |                                                               |       |  |                                                  |
|----|---------------|----------|---------------------------------------------------------------|-------|--|--------------------------------------------------|
|    |               |          |                                                               |       |  | KIQAYK.G                                         |
|    |               |          |                                                               | N3014 |  | R.TIGQSTNSILNEFQHM#N*DTLNQYPPSIN*CS<br>SKIQAYK.G |
|    |               |          |                                                               | N311  |  | K.LSPVSTLIN*SSQKM#STLPQNQHTESM#DTS<br>R.Q        |
| 72 | IPI00111885.1 | Q9CZ13   | Uqcrc1 Cytochrome b-c1 complex subunit 1, mitochondrial       | N153  |  | K.VVELLADIVQN*SSLEDSQIEK.E                       |
| 73 | IPI00882349.1 | E0CXA0   | Hdgf Uncharacterized protein                                  | N166  |  | K.N*STPSEPDSGQGPPEEEEEEEEEAAKEEAE<br>AQGVR.D     |
| 74 | IPI00849953.1 |          | Dnahc10 dynein, axonemal, heavy chain 10                      | N1251 |  | K.LM#GLGAKSVAEM#EEITTN*LTK.L                     |
| 75 | IPI00310059.1 | O70570   | Pigr Polymeric immunoglobulin receptor                        | N170  |  | K.TN*QSCSELVIDSTEK.V                             |
| 76 | IPI00874741.1 | P01901   | H2-K1 H-2 class I histocompatibility antigen, K-B alpha chain | N197  |  | K.NGN*ATLLR.T                                    |
|    |               |          |                                                               | N107  |  | R.TLLGYYN*QSK.G                                  |
| 77 | IPI00469384.4 | Q69ZJ7-1 | C030046E11Rik Isoform 1 of Protein RIC1 homolog               | N281  |  | R.LM#AFGCASGCVQVYTIDN*TTGAMLLSHK.<br>L           |
| 78 | IPI00855162.2 | Q3V0H8   | 4932431P20Rik Putative uncharacterized protein                | N2190 |  | K.M#N*RSLLIKEAELSM#EEK.R                         |
| 79 | IPI00114692.6 | A2AKY4   | Zfp804a Zinc finger protein 804A                              | N374  |  | K.SNPNIIEKNPTVPNDRTSAQM#TTEEN*ITIND<br>VTK.M     |
| 80 | IPI00115599.6 | P50172   | Hsd11b1 Corticosteroid 11-beta-dehydrogenase isozyme 1        | N162  |  | K.QSN*GSIAVISSLAGK.M                             |
| 81 | IPI00122557.2 | Q8VCU1-1 | Gm4738 liver carboxylesterase 31-like isoform 1               | N311  |  | K.NVN*ISYIVN*DSFFPQRPEK.L                        |
|    |               |          |                                                               | N317  |  | K.NVN*ISYIVN*DSFFPQRPEK.L                        |
| 82 | IPI00134691.3 | Q63886   | Ugt1a1;Ugt1a2 UDP-glucuronosyltransferase 1-1                 | N89   |  | K.EN*VTATLVELGR.T                                |
| 83 | IPI00187353.1 | Q8R2E9   | Ero1lb ERO1-like protein beta                                 | N140  |  | K.LGAIN*STLSNESK.E                               |
|    |               |          |                                                               | N145  |  | K.LGAIN*STLSN*ESK.E                              |
| 84 | IPI00121378.2 | Q61490   | Alcam CD166 antigen                                           | N480  |  | K.IISPEEN*VTLTCTAENQLER.T                        |
| 85 | IPI00331680.8 | P97328   | Khk Ketoheokinase                                             | N105  |  | R.GVDVSQVTWQSQGDTPCSCCIVNNSN*GSR.<br>T           |

|     |               |          |                                                               |       |                                           |
|-----|---------------|----------|---------------------------------------------------------------|-------|-------------------------------------------|
| 86  | IPI00130010.4 | P06909   | Cfh complement factor H                                       | N694  | K.IQCVDGN*WTTLPVCIEEER.T                  |
| 87  | IPI00320420.3 | Q06890   | Clu Clusterin                                                 | N327  | R.QELN*DSLQVAER.L                         |
| 88  | IPI00407144.1 | Q60575-2 | Kif1b Isoform 2 of Kinesin-like protein KIF1B                 | N1193 | K.LNTM#N*KTTLGQSMSK.Y                     |
| 89  | IPI00400016.1 | P02468   | Lamc1 Laminin subunit gamma-1                                 | N1159 | K.MAAAN*VSITQPESTGEPNN*M#TLLAEEAR.<br>R   |
|     |               |          |                                                               | N1173 | K.MAAAN*VSITQPESTGEPNN*M#TLLAEEAR.<br>R   |
| 90  | IPI00320204.4 |          | 2210023G05Rik hypothetical protein LOC72361                   | N476  | K.LN*LTEEEK.L                             |
|     |               |          |                                                               | N100  | R.DGTSQPAICPQN*VTMNMEGLK.E                |
| 91  | IPI00113539.2 | P11276   | Fn1 Fibronectin                                               | N1006 | K.LDAPTNLQFVN*ETDR.T                      |
| 92  | IPI00112616.2 | P41234   | Abca2 ATP-binding cassette sub-family A member 2              | N14   | -.M#GFLHQLQLLLWKN*VTLK.R                  |
| 93  | IPI00830749.1 |          | Col6a3 Type VI collagen alpha 3 subunit                       | N1948 | R.QLINALQIN*NTAVGHALVLPAR.R               |
| 94  | IPI00119809.1 | Q07797   | Lgals3bp Galectin-3-binding protein                           | N543  | K.APIPTALDTN*SSK.T                        |
|     |               |          |                                                               | N69   | R.ALGYEN*ATQALGR.A                        |
| 95  | IPI00129348.1 |          | Pcdhb1 protocadherin beta 1                                   | N257  | R.LVYRAQVPENSDN*GSLVVVVTATDLDEGT<br>NK.Q  |
| 96  | IPI00112032.2 | Q9CZ42-1 | Carkd carbohydrate kinase domain-containing protein precursor | N258  | K.LSQALGN*ITVVQK.G                        |
| 97  | IPI00556781.1 | Q8K1M6-3 | Dnm1l Isoform 3 of Dynamin-1-like protein                     | N149  | R.WN*GTTPEQGGDGIGGGASPVK.D                |
| 98  | IPI00134344.6 |          | Spnb3 Putative uncharacterized protein                        | N634  | R.AAHGGAILGNALAN*ASDVR.E                  |
| 99  | IPI00136169.1 | Q8CCS6-1 | Pabpn1 Isoform 1 of Polyadenylate-binding protein 2           | N144  | K.ELQNEVEKQM#N*M#SPPPGNAGPVIM#SLE<br>EK.M |
| 100 | IPI00280250.5 | O89032-1 | Sh3pxd2a Isoform 1 of SH3 and PX domain-containing protein 2A | N414  | K.LDGNN*K.S                               |
| 101 | IPI00271262.7 | P28666   | Cpamd8 Murinoglobulin-2                                       | N294  | K.LDNNGCSTQEVN*ITELQSK.K                  |
| 102 | IPI00127447.3 | O35114   | Scarb2 Lysosome membrane protein 2                            | N105  | K.ANIQFGEN*GTTISAVTNK.A                   |

|     |               |          |                                                                                          |       |                                                 |
|-----|---------------|----------|------------------------------------------------------------------------------------------|-------|-------------------------------------------------|
| 103 | IPI00458583.3 | Q8VEK3   | Hnrnpu Heterogeneous nuclear ribonucleoprotein U                                         | N249  | K.TSLDWWTDTDCNMIN*GTDGDSFHPLISK.D               |
|     |               |          |                                                                                          | N56   | R.LQAALDNEAGGRPAMEPGN*GSLDLGGDA<br>AGR.S        |
| 104 | IPI00467600.3 | Q8R4U0   | Stab2 Stabilin-2                                                                         | N626  | R.SMANQIITFN*ISSK.G                             |
| 105 | IPI00125514.1 | Q9WUZ9   | Entpd5 Ectonucleoside triphosphate diphosphohydrolase 5                                  | N231  | R.GYLTSFEMFN*STFK.L                             |
| 106 | IPI00330961.7 |          | Prdm2 retinoblastoma protein-binding zinc finger protein                                 | N1510 | R.M#N*ASTSDLESKR.A                              |
| 107 | IPI00122043.4 | Q9JJN2   | Zfx4 Zinc finger homeobox protein 4                                                      | N698  | K.FPN*SSGFPNPSPDAISSTESR.D                      |
| 108 | IPI00122341.3 | Q61527-2 | ErbB4 receptor tyrosine-protein kinase erbB-4 precursor                                  | N138  | R.KDGNFGLQELGLKN*LTEILNGGVYVDQNK.<br>F          |
| 109 | IPI00114613.3 | Q7TT50   | Cdc42bpb Serine/threonine-protein kinase MRCK beta                                       | N28   | -.ADCSPQDLGEM#PLQSRHPSNPSPPGSPN*SS<br>NSPTSHK.T |
| 110 | IPI00378788.4 |          | D5ErtD577e hypothetical protein LOC320549                                                | N250  | K.NTSPIMN*LTR.D                                 |
| 111 | IPI00464194.2 | Q69ZL1-1 | Fgd6 Isoform 1 of FYVE, RhoGEF and PH<br>domain-containing protein 6                     | N338  | K.HVDTPGESTEEPGNNSN*GSSCLEDYCLK.N               |
| 112 | IPI00354163.6 | Q5DTW7-1 | 2810474O19Rik Isoform 1 of Uncharacterized protein<br>C12orf35 homolog                   | N179  | K.VQLPM#QNSENN*MSTKNK.F                         |
| 113 | IPI00410905.3 |          | Kcnma1 Large conductance Ca <sup>2+</sup> -activated potassium<br>channel DEC variant 10 | N76   | R.NPRN*ATSPISHVSSSK.K                           |
| 114 | IPI00943428.1 |          | Zfp804b zinc finger protein 804B                                                         | N630  | R.HSTCTNRWSSMN*RSSEDVTRPHAR.L                   |
| 115 | IPI00123915.2 | Q9WTV7   | Rlim E3 ubiquitin-protein ligase RLIM                                                    | N21   | R.RCIPCTSN*ESLWR.D                              |
| 116 | IPI00125778.4 | Q9WVA4   | Tagln2 Transgelin-2                                                                      | N106  | R.YGIN*TTDIFQTVDLWEGK.N                         |
| 117 | IPI00138061.1 | Q64735-1 | Cr11 Isoform 1 of Complement regulatory protein Crry                                     | N170  | R.IN*YTCNQGYR.L                                 |
| 118 | IPI00947579.1 |          | Myh15 myosin, heavy polypeptide 15                                                       | N168  | R.AFQDM#LRNGEN*QSIVFTGESGSGKTVNTK<br>.L         |
| 119 | IPI00857319.1 |          | Zfp644 MKIAA1221 protein                                                                 | N1014 | K.RTGN*GTPVK.R                                  |
| 120 | IPI00134585.1 | P16406   | Enpep Glutamyl aminopeptidase                                                            | N189  | K.GWLN*GSLVGFYK.T                               |

|     |               |          |                                                                                |       |                                           |
|-----|---------------|----------|--------------------------------------------------------------------------------|-------|-------------------------------------------|
| 121 | IPI00515713.7 |          | Pkd111 polycystin-1L1                                                          | N390  | R.IM#ANRLVSTASALVNAN*VSFECR.L             |
| 122 | IPI00409947.1 | Q925T6-4 | Grip1 Isoform 4 of Glutamate receptor-interacting protein 1                    | N191  | R.AM#PAEHN*LSM#TSGSMITAELE.L              |
| 123 | IPI00621027.2 | Q02788   | Col6a2 Collagen alpha-2(VI) chain                                              | N155  | R.GTFTDCALAN*MTQQIR.Q                     |
| 124 | IPI00221426.3 | Q8BFR4   | Gns N-acetylglucosamine-6-sulfatase                                            | N271  | K.TPM#TN*SSIR.F                           |
| 125 | IPI00460063.2 | Q9CQF9   | Pcyox1 Prenylcysteine oxidase                                                  | N196  | R.LLN*QTLR.E                              |
|     |               |          |                                                                                | N323  | K.MSN*ITFR.N                              |
| 126 | IPI00348586.3 | Q8BS35-1 | Tmem195 Isoform 1 of Alkylglycerol monooxygenase                               | N9    | R.SPGAQDN*VSVSQGM#R.A                     |
| 127 | IPI00667973.3 | Q6A065-1 | Cep170 Isoform 1 of Centrosomal protein of 170 kDa                             | N372  | R.SN*VSPSGHTSSM#SKVK.S                    |
| 128 | IPI00466371.2 | Q3V3R4   | Itga1 Integrin alpha-1                                                         | N100  | K.LDLPVN*TSIPNVTEIK.E                     |
|     |               |          |                                                                                | N882  | K.DSCSNQN*ITCR.V                          |
| 129 | IPI00229599.2 | Q8CH77-1 | Nav1 Isoform 1 of Neuron navigator 1                                           | N286  | K.CSQQHM#N*FTSVIGDTVERGSR.E               |
| 130 | IPI00119870.2 | Q61301-1 | Ctnna2 Isoform 1 of Catenin alpha-2                                            | N165  | K.N*ATNEQDLANR.F                          |
| 131 | IPI00117831.2 | Q61147   | Cp Ceruloplasmin                                                               | N138  | K.EYEGAVYPDND*TTDFQR.A                    |
| 132 | IPI00420658.3 | Q148W0   | Atp8b1 Probable phospholipid-transporting ATPase IC                            | N570  | R.N*SSAVSAAM#FK.N                         |
| 133 | IPI00121627.3 | Q8VBZ3   | Clptm1 Cleft lip and palate transmembrane protein 1 homolog                    | N295  | K.DYYPIN*ESLASLPLR.V                      |
| 134 | IPI00330146.6 | Q5F2E7-1 | Nufip2 Isoform 1 of Nuclear fragile X mental retardation-interacting protein 2 | N347  | K.EDSWTLFKPPPVPVDN*SSAKIVPK.I             |
| 135 | IPI00265219.4 | Q5SSE9-1 | Abca13 Isoform 1 of ATP-binding cassette sub-family A member 13                | N2429 | K.LSDLFSDVN*SSFPLR.S                      |
| 136 | IPI00116414.2 | Q99L88-1 | Sntb1 Isoform 1 of Beta-1-syntrophin                                           | N64   | K.VLVNLS DALVLSCEE GAAA YNGIGAATN*GSFCR.G |
| 137 | IPI00223045.2 | Q8BMK0   | Ccdc21 Coiled-coil domain-containing protein 21                                | N574  | R.YHPDSYLTEL M#APQN*LTSEMSPVDFK.R         |
| 138 | IPI00272501.4 | Q99NH0-2 | Ankrd17 ankyrin repeat domain-containing protein 17 isoform b                  | N231  | R.M#RAESTANAGQSDN*R.S                     |
| 139 | IPI00173158.1 | Q9DBU0   | Tm9sf1 Transmembrane 9 superfamily member 1                                    | N178  | R.IIFAN*VSVR.D                            |
| 140 | IPI00117630.4 | P11881-7 | Itp1 Isoform 7 of Inositol 1,4,5-trisphosphate receptor type 1                 | N2463 | R.VETGEN*CTSPAPK.E                        |

|     |               |          |                                                                                        |       |                                                   |
|-----|---------------|----------|----------------------------------------------------------------------------------------|-------|---------------------------------------------------|
| 141 | IPI00341196.3 | A2A6A1   | Gpatch8 G patch domain-containing protein 8                                            | N268  | K.GGSFTSVQITN*TTGLSQAPGLASQGISFGIK<br>NNLGPPLQK.L |
| 142 | IPI00128154.1 | P06797   | Ctsl Cathepsin L1                                                                      | N221  | R.AEFAVAN*DTGFVDIPQQEK.A                          |
| 143 | IPI00670741.3 | Q3UHK8   | Tnrc6a Trinucleotide repeat-containing gene 6A protein                                 | N665  | R.NYDGIN*LSHKDIEM#R.K                             |
| 144 | IPI00114162.3 | Q05816   | Fabp5 Fatty acid-binding protein, epidermal                                            | N124  | K.DGKMIVECVM#NN*ATCTRVEK.V                        |
| 145 | IPI00274979.1 | Q9ER47   | Kcnh7 Potassium voltage-gated channel subfamily H member<br>7                          | N348  | K.N*TSPPSSDK.T                                    |
| 146 | IPI00119478.1 | Q9JHJ0   | Tmod3 Tropomodulin-3                                                                   | N254  | R.SNDPVAVAFADM#LKVN*KTLK.S                        |
| 147 | IPI00122272.1 | Q61508-1 | Ecm1 Isoform Long of Extracellular matrix protein 1                                    | N535  | R.NVALVAGDTGN*ATGLGEQGPTR.G                       |
| 148 | IPI00222548.5 | P47915   | Rpl29;Gm13841;Gm8210 60S ribosomal protein L29                                         | N11   | K.SKNHTTHN*QSR.K                                  |
| 149 | IPI00131143.1 | Q9Z2G6-1 | Sel1l Isoform 1 of Protein sel-1 homolog 1                                             | N604  | R.EATIVGEN*ETYPR.A                                |
| 150 | IPI00356852.3 |          | Zfp648 Uncharacterized protein                                                         | N445  | K.KGGN*STKGPMEGPK.Q                               |
| 151 | IPI00223928.4 | Q8C0R0-1 | Usp37 Isoform 1 of Ubiquitin carboxyl-terminal hydrolase 37                            | N405  | K.NN*LSLAVNFSYRK.L                                |
| 152 | IPI00116310.7 | P0C6F1   | Dnahc2 Uncharacterized protein                                                         | N2353 | K.SSGTGGVIMTSHRSN*K.T                             |
| 153 | IPI00129646.4 | Q01965   | Ly9 T-lymphocyte surface antigen Ly-9                                                  | N120  | R.LKVSEGDGYSLYM#SN*LTK.S                          |
| 154 | IPI00114833.1 | P56695   | Wfs1 Wolframin                                                                         | N663  | R.SEGM#KVYN*STLTWQQYGFLCGPRAWK.E                  |
| 155 | IPI00672924.2 |          | Ctnbp2 Ctnbp2 protein                                                                  | N29   | R.TN*SSSSSNR.K                                    |
| 156 | IPI00762484.2 | Q4VA61   | Dscaml1 Down syndrome cell adhesion molecule-like 1                                    | N614  | R.QVVFEN*GTLK.L                                   |
| 157 | IPI00343249.6 | B2RR83   | Ythdc2 Probable ATP-dependent RNA helicase YTHDC2                                      | N464  | R.DVHVLPYPM#GAVLAAKVVAWN*ESNTNV<br>DR.I           |
| 158 | IPI00339885.2 | Q04857   | Col6a1 Collagen alpha-1(VI) chain                                                      | N801  | K.N*ITAQICIDK.K                                   |
| 159 | IPI00407541.2 | P42703-2 | Lifr Isoform 2 of Leukemia inhibitory factor receptor                                  | N385  | R.IEGLTN*ETYSR.L                                  |
| 160 | IPI00469945.3 | Q69ZB0-2 | Lrrcc1 Isoform 2 of Leucine-rich repeat and coiled-coil<br>domain-containing protein 1 | N394  | K.VDKN*FSDNSTYSR.S                                |
| 161 | IPI00115762.1 | P11627   | L1cam Neural cell adhesion molecule L1                                                 | N824  | K.GPEPQVTIGYSGEDYPQVSPELITIFN*SST<br>VLVR.W       |

|     |                |          |                                                                                                   |       |                                             |
|-----|----------------|----------|---------------------------------------------------------------------------------------------------|-------|---------------------------------------------|
| 162 | IPI00468189.6  | Q6S5J6-1 | Krit1 Isoform 1 of Krev interaction trapped protein 1                                             | N441  | R.SVELKHGNN*TTAQQIM#EGMRLSQETQR.Y           |
| 163 | IPI00317356.10 | P52430   | Pon1 Serum paraoxonase/arylesterase 1                                                             | N253  | K.HAN*WTLTPLK.V                             |
| 164 | IPI00830223.1  |          | Tpm1 tropomyosin alpha-1 chain isoform 10                                                         | N193  | R.N*LSAVDAEATERLK.R                         |
| 165 | IPI00136002.1  | Q91Z31-2 | Ptpb2 Isoform 2 of Polypyrimidine tract-binding protein 2                                         | N31   | R.GSDELLSGSVLSSPNSN*M#SGM#VVTANGN<br>*DSK.K |
|     |                |          |                                                                                                   | N42   | R.GSDELLSGSVLSSPNSN*M#SGM#VVTANGN<br>*DSK.K |
| 166 | IPI00918392.1  |          | Depdc5 Protein                                                                                    | N735  | R.TVTLDVDVNN*R.T                            |
| 167 | IPI00675799.5  | A6H584   | Gm7455 Collagen alpha-5(VI) chain                                                                 | N292  | R.DLQNFLEN*VTSSVDVK.D                       |
| 168 | IPI00111960.2  | P70699   | Gaa Lysosomal alpha-glucosidase                                                                   | N140  | R.LEN*LSSTESGYTATLTR.T                      |
| 169 | IPI00122973.1  | P13597-1 | Icam1 Isoform 1 of Intercellular adhesion molecule 1                                              | N47   | R.EAFLPQGGSVQVN*CSSSCK.E                    |
| 170 | IPI00116921.1  | Q61009   | Scarb1 Scavenger receptor class B member 1                                                        | N310  | R.FTAPDTLFAN*GSVYPPNEGFCPCR.E               |
| 171 | IPI00970764.1  |          | Nbeal1 neurobeachin like 1                                                                        | N1406 | K.N*LSNVNEFNAK.L                            |
| 172 | IPI00112614.2  | P41233   | Abca1 ATP-binding cassette sub-family A member 1                                                  | N98   | R.YPTPGEAPGVVGNFN*K.S                       |
| 173 | IPI00224073.3  | Q8C165   | Pm20d1 Probable carboxypeptidase PM20D1                                                           | N443  | R.HYAN*ITNGMYR.F                            |
| 174 | IPI00120245.1  | P43406   | Itgav Integrin alpha-V                                                                            | N615  | R.TAADATGLQPILNQFTPAN*VSR.Q                 |
| 175 | IPI00119871.3  | Q02357-2 | Ank1 Ank1 protein                                                                                 | N1825 | K.DLN*GSRAARLFSTAADAAPDSGSR.R               |
| 176 | IPI00125681.4  | Q6PD26   | Pigs GPI transamidase component PIG-S                                                             | N370  | K.IYN*ASELPVR.V                             |
| 177 | IPI00742433.1  | Q8VDM6-2 | Hnrnpul1 Isoform 2 of Heterogeneous nuclear ribonucleoprotein U-like protein 1                    | N173  | R.NYNGRN*NSNNDR.N                           |
| 178 | IPI00131648.4  | P82976   | Gbx1 Homeobox protein GBX-1                                                                       | N378  | R.IKAGN*VSSR.S                              |
| 179 | IPI00399663.1  | Q6RT24   | Cenpe Centromere-associated protein E                                                             | N2147 | R.ITAM#IN*ESTEFEER.S                        |
| 180 | IPI00125538.8  | Q80TY5   | Vps13b Vacuolar protein sorting-associated protein 13B                                            | N3171 | K.LEVNQISGELTPLPN*K.S                       |
| 181 | IPI00115992.1  |          | Gm4963 Uncharacterized protein                                                                    | N14   | -.ADEGAAPSGGGKTN*R.T                        |
| 182 | IPI00117935.2  | Q61194-2 | Pik3c2a Isoform 2 of Phosphatidylinositol-4-phosphate 3-kinase C2 domain-containing subunit alpha | N6    | M.AQISN*NSEFK.Q                             |

|     |               |          |                                                                 |       |                                                    |
|-----|---------------|----------|-----------------------------------------------------------------|-------|----------------------------------------------------|
| 183 | IPI00975027.1 |          | Hnf4a HNF4alpha11                                               | N24   | -.MSDRGQGFLQITSDTSPSEGANLN*SSNSLGV<br>SALCAICGDR.A |
| 184 | IPI00226357.2 |          | E230019M04Rik Putative uncharacterized protein                  | N204  | K.AEMSKAELN*GTK.V                                  |
| 185 | IPI00320605.3 | P11835   | Itgb2 Integrin beta-2                                           | N51   | K.LN*FTGPGEPDSL.R.C                                |
| 186 | IPI00620986.3 | P40645-1 | Sox6 Isoform 1 of Transcription factor SOX-6                    | N299  | R.CNSLGM#NN*MSSLK.G                                |
| 187 | IPI00132595.4 | O35600   | Abca4 Retinal-specific ATP-binding cassette transporter         | N1932 | R.VM#SGGN*KTDILK.L                                 |
| 188 | IPI00348717.6 |          | BC005561 cDNA sequence BC005561                                 | N1252 | K.GN*LSNGNSGSNSKAVKENDK.E                          |
| 189 | IPI00187290.1 | Q9CZW6   | Rnf146 RING finger protein 146                                  | N16   | R.VN*VSMTGGGAVSRDTGSR.D                            |
| 190 | IPI00118500.1 | Q9D3V5-2 | Fsip1 Isoform 2 of Fibrous sheath-interacting protein 1         | N160  | R.EEVGSN*STHGEQGSNLKNVMDIK.V                       |
| 191 | IPI00223384.5 | Q80ZA4-1 | Pkhd111 Isoform 1 of Fibrocystin-L                              | N2358 | K.LN*ATGAR.G                                       |
| 192 | IPI00667268.3 |          | Ttc17 Tetratricopeptide repeat domain 17                        | N743  | R.CM#QFYFPFLYN*ATSSVCGGTVVEESN*GSD<br>EVEK.S       |
| 193 | IPI00667268.3 |          | Ttc17 Tetratricopeptide repeat domain 17                        | N758  | R.CM#QFYFPFLYN*ATSSVCGGTVVEESN*GSD<br>EVEK.S       |
| 194 | IPI00223579.5 | Q8C033-1 | Arhgef10 Isoform 1 of Rho guanine nucleotide exchange factor 10 | N688  | R.QSM#VAHSEHSN*R.S                                 |
| 195 | IPI00665988.3 |          | Fam184a hypothetical protein LOC75906                           | N234  | K.AEGLHRM#EVEALN*NTVKELR.L                         |
| 196 | IPI00226509.2 |          | Zfp300 zinc finger protein 300                                  | N643  | K.ENKELKMEN*LS.-                                   |
| 197 | IPI00223178.3 | Q3UP23   | Tmem26 Transmembrane protein 26                                 | N102  | R.M#AQN*FSRR.G                                     |
| 198 | IPI00169485.3 |          | Rab11fip1 rab11 family-interacting protein 1                    | N221  | K.EEEVTGPGPLEEN*ESSRVQPRFDCQNETPV<br>EGAR.G        |
| 199 | IPI00331143.6 | O88509-1 | Dnmt3b Isoform 1 of DNA (cytosine-5)-methyltransferase 3B       | N428  | K.GCSLCRDELNGKN*NTVESAMR.E                         |
| 200 | IPI00122184.1 | P58682   | Tlr8 Toll-like receptor 8                                       | N111  | K.QQHPNENKNGM#N*ITEGALLSLR.N                       |
| 201 | IPI00406741.6 | P27546-4 | Mtap4 Isoform 4 of Microtubule-associated protein 4             | N692  | K.RN*TTPTGAAPPAGM#TSTR.V                           |
| 202 | IPI00121004.1 | Q9JJ26   | Mefv Pryn                                                       | N501  | R.M#RILSGN*RTEEQTPLVESNPPEGER.S                    |
| 203 | IPI00322492.3 |          | Ewsr1 Ewing sarcoma breakpoint region 1                         | N297  | R.QDHPSSMGVYGQESGGFSGPGEN*R.S                      |

|     |               |          |                                                          |       |                                                         |
|-----|---------------|----------|----------------------------------------------------------|-------|---------------------------------------------------------|
| 204 | IPI00136967.2 | P23819-1 | Gria2 Isoform 1 of Glutamate receptor 2                  | N510  | K.LEM#IN*ITYNIR.K                                       |
| 205 | IPI00757144.2 | Q66JQ7   | Casc5 Cancer susceptibility candidate 5                  | N922  | K.N*KSITFPENDK.S                                        |
| 206 | IPI00469307.2 | P55302   | Lrpap1 Alpha-2-macroglobulin receptor-associated protein | N271  | R.VIDLWDLAQSAN*FTEK.E                                   |
| 207 | IPI00128363.1 | Q8VHJ5   | Mark1 Serine/threonine-protein kinase MARK1              | N304  | R.AMSGGSYVN*NSPSATSKKR.D                                |
| 208 | IPI00119033.1 | Q60625   | Icam5 Intercellular adhesion molecule 5                  | N124  | R.GHANTAACEYEGGHSGM#AGAVSLTSN*N*<br>SSLGLNLAGPPAR.W     |
| 209 | IPI00475164.2 | Q8BX22-1 | Sall4 Isoform 1 of Sal-like protein 4                    | N28   | K.AMGDPVALKEGN*GSM#PM#SVGTQSGDLK<br>.S                  |
| 210 | IPI00405742.6 |          | Plxnb2 plexin B2                                         | N530  | K.SCVAITDAFPQN*M#SR.R                                   |
| 211 | IPI00114958.1 | O08677-1 | King1 Isoform HMW of Kininogen-1                         | N82   | K.EGN*CSAQSGLAWQDCDFK.D                                 |
| 212 | IPI00265371.3 | Q3V132   | Slc25a31 ADP/ATP translocase 4                           | N3    | -.MSN*ESSKK.Q                                           |
| 213 | IPI00468179.3 |          | Zmynd8 Protein kinase C binding protein 1                | N1079 | K.DSSN*STLDLGSR.E                                       |
| 214 | IPI00329839.7 | Q810A7-1 | Ddx42 Isoform 1 of ATP-dependent RNA helicase DDX42      | N158  | K.GNGGGIGERSNNGSATNNVGQAGISPYTVP<br>ASSIN*GSNNFGPIN*K.T |
| 215 | IPI00329839.7 | Q810A7-1 | Ddx42 Isoform 1 of ATP-dependent RNA helicase DDX42      | N167  | K.GNGGGIGERSNNGSATNNVGQAGISPYTVP<br>ASSIN*GSNNFGPIN*K.T |
| 216 | IPI00320916.2 | Q99MV1   | Tdrd1 Tudor domain-containing protein 1                  | N1047 | K.SKEPTVN*SSPK.T                                        |
| 217 | IPI00918363.1 |          | C6 Complement component 6                                | N324  | K.VLN*FTMK.A                                            |
| 218 | IPI00115607.3 | Q99JY0   | Hadhb Trifunctional enzyme subunit beta, mitochondrial   | N297  | K.NLDLMM#KRMN*R.S                                       |
| 219 | IPI00119012.1 | Q61271   | Acvr1b Activin receptor type-1B                          | N115  | K.M#N*ITEDLVEPAM#YRK.T                                  |
| 220 | IPI00620823.2 | Q99KY4-2 | Gak Isoform 2 of Cyclin-G-associated kinase              | N758  | K.FEEKEPETGLDN*TSPK.E                                   |
| 221 | IPI00124666.1 | Q9WUH7   | Sema4g Semaphorin-4G                                     | N386  | R.GYN*SSQDLPSLVLDFVK.L                                  |
| 222 | IPI00127770.3 | Q9R0L9   | Cd164 Sialomucin core protein 24                         | N98   | K.TYCANEPLSN*CSQVN*R.T                                  |
|     |               |          |                                                          | N103  | K.TYCANEPLSN*CSQVN*R.T                                  |
| 223 | IPI00130630.1 | O35409   | Folh1 Glutamate carboxypeptidase 2                       | N663  | K.ALEFNN*QTGALHPTR.T                                    |
| 224 | IPI00135659.2 | Q63912   | Omg oligodendrocyte-myelin glycoprotein                  | N392  | R.GMPNN*FSEMPRQSTTLNLR.E                                |



|     |               |          |                                                                                          |       |                                              |
|-----|---------------|----------|------------------------------------------------------------------------------------------|-------|----------------------------------------------|
| 225 | IPI00469208.3 | Q6A058   | Armcx2 Armadillo repeat-containing X-linked protein 2                                    | N606  | K.EKALMAM#NN*LSENYENQGR.L                    |
| 226 | IPI00109656.2 | Q99K28-2 | Arfgap2 Isoform 2 of ADP-ribosylation factor<br>GTPase-activating protein 2              | N87   | R.CM#QVGGNAN*ATAFFRQHGCMA#ANDANT<br>KYTSR.A  |
| 227 | IPI00136925.2 | P01592   | Igj Immunoglobulin J chain                                                               | N70   | R.EN*ISDPTSPLR.R                             |
| 228 | IPI00227349.1 | Q8BZ60   | Ston2 Stonin-2                                                                           | N555  | R.QSKGTTSSVSSN*QSR.R                         |
| 229 | IPI00974842.1 |          | Gm10456;Nhsl2 NHS-like protein 2                                                         | N102  | R.EN*ATATAHSR.S                              |
| 230 | IPI00338209.2 | Q9Z2A9-1 | Ggt5 Isoform 1 of Gamma-glutamyltransferase 5                                            | N204  | R.QLFFN*GTETLR.S                             |
| 231 | IPI00125861.2 | Q811D0-3 | Dlg1 Isoform 3 of Disks large homolog 1                                                  | N220  | R.YSSESAN*STVHQDADSTEQESQDKNK.Y              |
| 232 | IPI00664551.2 | Q9WVB4   | Slit3 Slit homolog 3 protein                                                             | N1183 | K.LGQFADPAIDSIQN*K.S                         |
| 233 | IPI00130238.5 | Q9Z1K7   | Apc2 Uncharacterized protein                                                             | N494  | R.RYAGMTLTN*LTFGDVANK.A                      |
| 234 | IPI00395054.1 | Q8VI24-2 | Satb2 Isoform 2 of DNA-binding protein SATB2                                             | N385  | R.SM#NPN*VSM#VSSASSPSSSR.T                   |
| 235 | IPI00132600.1 | O35604   | Npc1 Niemann-Pick C1 protein                                                             | N1064 | R.LIASN*ITETMR.S                             |
| 236 | IPI00108041.1 | P70302   | Stim1 Stromal interaction molecule 1                                                     | N171  | R.LAVTN*TTMTGTVLK.M                          |
| 237 | IPI00850998.2 |          | Gm3029 similar to Predicted gene, EG545013 isoform 1                                     | N209  | R.LGAGEVERAEM#GSQQEKASSACIN*K.S              |
| 238 | IPI00844764.1 | Q8CDP0-1 | Agbl3 Isoform 1 of Cytosolic carboxypeptidase 3                                          | N373  | R.VHPGETN*SSWIM#KGFLDYILGDSSDAR.L            |
| 239 | IPI00828820.1 |          | M6pr ORF 2 protein                                                                       | N84   | R.EASN*HSSGAGLVQINK.S                        |
| 240 | IPI00153528.1 |          | Vmn1r233 Vomeronasal receptor V1RF5                                                      | N152  | K.LN*TTSENSYKAR.M                            |
| 241 | IPI00785324.1 | Q3UZ39-3 | Lrrfip1 Isoform 3 of Leucine-rich repeat flightless-interacting<br>protein 1             | N268  | R.DEKPIQAEAQASPGAPIN*QSGHQDTTGPGS<br>TDAQR.T |
| 242 | IPI00408491.4 | Q5QNQ9   | Col27a1 Collagen alpha-1(XXVII) chain                                                    | N1160 | R.GLPGPN*GSLGPLGM#NGKAGDHAQGPSLG<br>PDGK.Q   |
| 243 | IPI00228044.1 | Q923T9-2 | Camk2g Isoform 2 of Calcium/calmodulin-dependent protein<br>kinase type II subunit gamma | N184  | K.N*NSQPKVGGDSK.K                            |
| 244 | IPI00380484.1 | Q7TQE6   | Tmem57 Macoilin                                                                          | N324  | K.N*ASGVVN*SSPR.S                            |
|     |               |          |                                                                                          | N330  | K.N*ASGVVN*SSPR.S                            |
| 245 | IPI00474384.3 |          | Grik1 glutamate receptor, ionotropic kainate 1 isoform a                                 | N605  | R.FTPYEWYNPHPCNPDSDVVENN*FTLLNSF             |

|     |               |          |                                                         |       |  |                                                       |
|-----|---------------|----------|---------------------------------------------------------|-------|--|-------------------------------------------------------|
|     |               |          | precursor                                               |       |  | WFGVGALM#R.Q                                          |
| 246 | IPI00323964.4 | P70298   | Cux2 Homeobox protein cut-like 2                        | N619  |  | K.NSPASVSIPN*GTASSSTSEDAIK.N                          |
| 247 | IPI00120674.2 |          | Itgam Putative uncharacterized protein                  | N1202 |  | K.KTSGN*STRAR.S                                       |
| 248 | IPI00318215.1 | Q9EPS3   | Glce D-glucuronyl C5-epimerase                          | N394  |  | K.GFLDN*ITISTTAHMAAFFAASDWLVR.N                       |
| 249 | IPI00124830.3 | Q61735-2 | Cd47 Isoform 2 of Leukocyte surface antigen CD47        | N109  |  | R.DAMVGN*YTCEVTELSR.E                                 |
| 250 | IPI00113528.1 | Q9ET30   | Tm9sf3 Transmembrane 9 superfamily member 3             | N172  |  | R.IVDVN*LTSEGK.V                                      |
| 251 | IPI00620362.4 | Q8R081   | Hnrnp1 Heterogeneous nuclear ribonucleoprotein L        | N522  |  | R.IHVVPSAPTKHPDDYNEGGGGGAAGSGGGG<br>GGGHQDGAN*ETKLR.K |
| 252 | IPI00321477.1 |          | Eng endoglin isoform 1                                  | N135  |  | R.VN*ITVLPSTSR.K                                      |
| 253 | IPI00816884.1 |          | Hnrnp3 heterogeneous nuclear ribonucleoprotein H3       | N268  |  | R.YIELFLN*STPGGGSGM#GGSGMGGYGR.D                      |
| 254 | IPI00474711.3 | P70268-2 | Pkn1 Isoform 2 of Serine/threonine-protein kinase N1    | N159  |  | K.QGAENM#IQTYSN*GSSKDR.K                              |
| 255 | IPI00346297.7 |          | E030019B06Rik E030019B06Rik protein                     | N344  |  | K.NKGADGVATPMQN*R.S                                   |
| 256 | IPI00224644.1 | Q99MR6-3 | Srrt Isoform C of Serrate RNA effector molecule homolog | N602  |  | R.LDN*ETGGEM#K.I                                      |
| 257 | IPI00417158.1 | P61406   | Smg6 Telomerase-binding protein EST1A                   | N742  |  | R.EQAN*DTANYGKARSWYLK.A                               |
| 258 | IPI00410733.3 | Q6NY15-1 | Tsga10 Isoform 1 of Testis-specific gene 10 protein     | N200  |  | K.AEN*NSLR.L                                          |
| 259 | IPI00857278.1 |          | Gpatch2 Putative uncharacterized protein                | N130  |  | K.DRSDSDQMLVANGGPSSN*LSSSVR.G                         |
| 260 | IPI00453948.1 | Q6PCZ4   | Magee1 Melanoma-associated antigen E1                   | N484  |  | R.STGLGMITISNSN*KSDR.L                                |
| 261 | IPI00857855.1 |          | Mup9 Major urinary protein 2                            | N171  |  | R.ENIIDLSN*ASK.S                                      |
| 262 | IPI00268218.5 | Q8BMQ3-1 | Bnc2 Isoform 1 of Zinc finger protein basonuclein-2     | N608  |  | K.DRNNRLM#PMHLRPNPN*ASHR.N                            |
| 263 | IPI00469208.3 | Q6A058   | Armxc2 Armadillo repeat-containing X-linked protein 2   | N175  |  | R.GQNEYN*ESLNNMAM#LAK.E                               |
| 264 | IPI00125266.1 | Q9WV54   | Asah1 Acid ceramidase                                   | N258  |  | R.SVLEN*TTSYEEAK.N                                    |
| 265 | IPI00466187.5 |          | Myo10 myosin X                                          | N1433 |  | R.VFFPN*SSSLTAM#LSHLSDK.F                             |
| 266 | IPI00109676.6 | Q80TJ7-1 | Phf8 Isoform 1 of Histone lysine demethylase PHF8       | N966  |  | K.QEALSGSLADHEYTARPNAFGMAQAN*RST<br>TPM#APGVFLTQR.R   |
| 267 | IPI00867833.1 |          | Vmn2r6 vomeronasal receptor Vmn2r6                      | N20   |  | K.DILPN*HTLGYQIFDNCFSTTK.A                            |

|     |               |          |                                                                                |       |                                              |
|-----|---------------|----------|--------------------------------------------------------------------------------|-------|----------------------------------------------|
| 268 | IPI00421108.2 | A2AKX3-1 | Setx Isoform 1 of Probable helicase senataxin                                  | N1540 | R.VVEESVSDGCGLNNN*TSDAVHTVYSK.Q              |
| 269 | IPI00224680.5 | Q8C2K1-1 | Def6 Isoform 1 of Differentially expressed in FDCP 6                           | N92   | R.NM#QVNWHKVN*TSAQR.L                        |
| 270 | IPI00788495.2 | P46686-2 | Tulp2 Isoform 2 of Tubby-related protein 2                                     | N381  | K.TSNYLISLDPKDM#SRN*GSNFVGK.V                |
| 271 | IPI00454005.2 | Q7TN98-1 | Cpeb4 Isoform 1 of Cytoplasmic polyadenylation element-binding protein 4       | N604  | K.EKGNSN*ESSSDGPNEEAKAK.E                    |
| 272 | IPI00880739.1 |          | Plk3 Polo-like kinase 3 (Drosophila), isoform CRA_b                            | N10   | -.FPAGPGPPAN*ASPR.S                          |
| 273 | IPI00660178.4 | A2AHJ4-1 | Brwd3 Isoform 1 of Bromodomain and WD repeat-containing protein 3              | N1388 | K.TVKDEASTLNN*GSM#KTAMDLVISK.W               |
| 274 | IPI00857532.1 |          | Lrrc51 Uncharacterized protein                                                 | N2    | -.AN*GSKLQAAIPGPSEVSTLRPSVPCTACCMS YGK.E     |
| 275 | IPI00223890.1 | Q8C0P0-1 | Mastl Isoform 1 of Microtubule-associated serine/threonine-protein kinase-like | N453  | R.N*FHLVDSSPCQEIMQSKKN*CTEYEANK.E            |
| 276 | IPI00330066.5 | Q3UJB9-1 | Edc4 Isoform 1 of Enhancer of mRNA-decapping protein 4                         | N1098 | K.N*LTDIARAAADTLQGPM#QAAYR.E                 |
| 277 | IPI00319525.3 | Q9ET01   | Pygl Glycogen phosphorylase, liver form                                        | N3    | K.GN*ASVGN*SSENSLSIK.L                       |
| 278 | IPI00319525.3 | Q9ET01   | Pygl Glycogen phosphorylase, liver form                                        | N8    | K.GN*ASVGN*SSENSLSIK.L                       |
| 279 | IPI00676513.5 | A3KGB4   | Tbc1d8b TBC1 domain family member 8B                                           | N987  | R.M#N*QSQFIQFSK.T                            |
| 280 | IPI00753613.2 |          | Ttl5 Uncharacterized protein                                                   | N19   | R.NTHAPDTSNTIPM#FAAPN*LSSQLGNLQGE ASSGKSAR.Q |
| 281 | IPI00136928.3 | Q9QZ82   | Cyp11a1 Cholesterol side-chain cleavage enzyme, mitochondrial                  | N315  | K.NIQAN*ITEM#LAGGVDTTSM#TLQWNLYE M#AHNLK.V   |
| 282 | IPI00471437.1 |          | Igh protein                                                                    | N321  | R.EDYN*STLR.V                                |
| 283 | IPI00322447.4 | Q8R5M8-1 | Cadm1 Isoform 1 of Cell adhesion molecule 1                                    | N104  | R.FQLLN*FSSSELK.V                            |
| 284 | IPI00667827.2 |          | Cdh18 cadherin 18                                                              | N255  | R.EHYSVVIQAKDMAGQVGGLSGSTTVN*ITLT DVNDNPPR.F |
| 285 | IPI00226926.3 |          | Slco5a1 solute carrier organic anion transporter family, member 5A1            | N48   | K.SLPVLHSASCRQN*FSAGNADGK.L                  |

|     |               |          |                                                                        |      |                                            |
|-----|---------------|----------|------------------------------------------------------------------------|------|--------------------------------------------|
| 286 | IPI00653175.1 |          | Acp2 Putative uncharacterized protein                                  | N167 | R.YEQLQN*ETR.Q                             |
| 287 | IPI00553387.6 |          | Grm5 glutamate receptor, metabotropic 5 isoform a                      | N444 | K.TN*FTGVSGDM#ILFDENGDSPGR.Y               |
| 288 | IPI00126050.3 | Q9WVJ3-1 | Pgcp Isoform 1 of Plasma glutamate carboxypeptidase                    | N394 | K.EVMNLLQPLN*VTK.V                         |
| 289 | IPI00417180.3 |          | Ugt1a10 UDP glycosyltransferase 1 family, polypeptide A10              | N71  | K.SLN*CTVK.T                               |
| 290 | IPI00137459.6 | B2RRE7   | Otud4 OTU domain-containing protein 4                                  | N879 | K.RSLPLDASNGNNKPN*ESGSPK.F                 |
| 291 | IPI00315952.2 |          | Senp7 sentrin-specific protease 7 isoform 2                            | N778 | K.ENN*LTEDNPDLVAQR.R                       |
| 292 | IPI00606087.4 | Q80YQ2-1 | Med23 mediator of RNA polymerase II transcription subunit 23 isoform 2 | N884 | R.MIGNGYITEVLAGMPLTFCESN*TSYANCLL<br>AIK.Y |
| 293 | IPI00312724.2 | Q8R3C1-1 | C87436 Isoform 1 of Uncharacterized protein C2orf42 homolog            | N316 | K.KDEVSGAQVN*SSLMPQDAVNSNLR.K              |

---
